# Supplementary material for: Population-level effects of clinical immunity to malaria
Source: BMC Infect Dis. 2013 Sep 11;13:428. doi: 10.1186/1471-2334-13-428 (PMC3848694; doi:10.1186/1471-2334-13-428)
Supplement: Additional file 1 — Backwards bifurcation. [file 1471-2334-13-428-S1.pdf]

## Additional File 1 – Backwards Bifurcation

To determine if bistability can occur, we analyze our model at the bifurcation point,  $\mathcal{R}_0 = 1$ , to determine the size of the ratio  $\rho = \frac{\mathcal{R}_{NN}}{\mathcal{R}_{CC}}$  must be in order for a backwards bifurcation to occur.

To analyze our model, we can disregard  $\frac{dS_N}{dt}$  because the population remains constant. So we re-write  $\frac{dI_N}{dt}$ ,  $\frac{dS_C}{dt}$ , and  $\frac{dI_C}{dt}$  in terms of  $I_N, S_C, I_C$  and  $T$ . We define  $Y$  to be the vector  $(I_N, S_C, I_C)$ . We take the Jacobian of  $Y$ ,  $H(Y)$ .

We then find the eigenvectors of the matrix  $H(Y)$  at equilibrium (when  $Y=0$ ). The eigenvectors determine whether or not a backwards bifurcation will occur at  $R_0 = 1$ . This is determined by the sign of the dominant eigenvectors of the Jacobian matrix [41]. The dominant right eigenvector, which gives the direction of the initial spread of the disease, is  $V = [1, \frac{\gamma_{NC}}{\tau_N - \gamma_{NN} - \gamma_{NC} + \alpha}, 0]$  and the dominant left eigenvector which gives the contribution of each infected group to the overall spread is given by  $W = [1, 0, \frac{\tau_C}{\tau_N - \gamma_{NN} - \gamma_{NC} + \gamma_C}]$ .

To determine the criterion  $\rho^*$ , which gives the amount  $\mathcal{R}_{CC}$  needs to be larger than  $\mathcal{R}_{NN}$  in order for a backward bifurcation to occur, we look at the Jacobian matrix,  $H$  perturbed just a little from 0. Dushoff [41] showed that a backward bifurcation will occur if and only if

$$\rho^* = W \cdot H_\varepsilon(0)V > 0 \quad (1)$$

For our model, we calculated  $\rho^*$  to be:

$$\rho^* = 1 + \frac{\alpha + \mu}{\gamma_{NC}} \quad (2)$$

We take  $\frac{1}{\alpha + \mu}$  to be the length of immunity ( $L$ ),  $\frac{1}{\gamma_{NN} + \gamma_{NC}}$  to be the duration of infection ( $D$ ), and  $\frac{\gamma_{NC}}{\gamma_{NN} + \gamma_{NC}}$ . We find that when  $\mathcal{R}_0 = 1$ , bistability will occur when:

$$\rho^* = 1 + \frac{D}{\pi L} \quad (3)$$
